# Supplementary material for: A Regulatory Circuitry Between Gria2, miR-409, and miR-495 Is Affected by ALS FUS Mutation in ESC-Derived Motor Neurons
Source: PubMed Central journal article supplement (PMC6132778; doi:10.1007/s12035-018-0884-4), 2018-02-12

## Online resource

### *Molecular Neurobiology*

*A regulatory circuitry between Gria2, miR-409 and miR-495 is affected by ALS FUS mutation in ESC-derived motor neurons*

Davide Capauto<sup>1,2</sup>, Alessio Colantoni<sup>2</sup>, Lei Lu<sup>3</sup>, Tiziana Santini<sup>1</sup>, Giovanna Peruzzi<sup>1</sup>, Silvia Biscarini<sup>1,2</sup>, Mariangela Morlando<sup>2</sup>, Neil A. Shneider<sup>3</sup>, Elisa Caffarelli<sup>4</sup>, Pietro Laneve<sup>1,\*</sup>, Irene Bozzoni<sup>1,2,4,5,\*</sup>.

1. Center for Life Nano Science@Sapienza, Istituto Italiano di Tecnologia, Rome, Italy.
2. Department of Biology and Biotechnology, Sapienza University of Rome, Italy.
3. Department of Neurology, Center for Motor Neuron Biology and Disease, Columbia University, New York City, NY, USA.
4. Institute of Molecular Biology and Pathology, CNR, Rome, Italy.
5. Institute Pasteur Fondazione Cenci-Bolognetti, Sapienza University of Rome, Italy.

\* Corresponding authors:

e-mail: [irene.bozzoni@uniroma1.it](mailto:irene.bozzoni@uniroma1.it) ; [pietro.laneve@iit.it](mailto:pietro.laneve@iit.it)

## Supplementary Figure S1

**a**

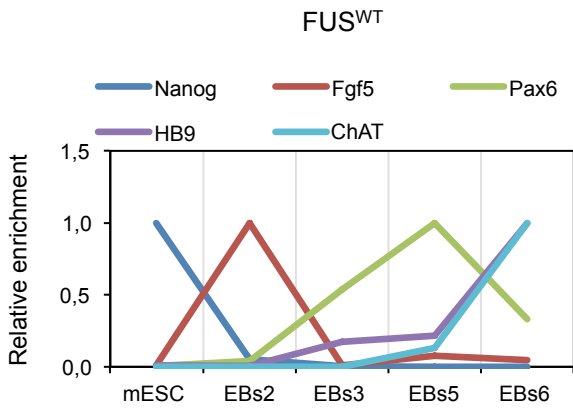

**b**

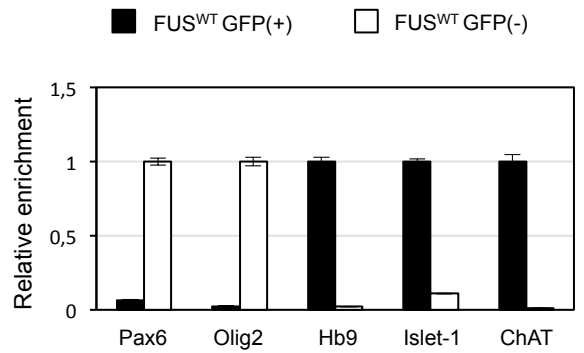

**c**

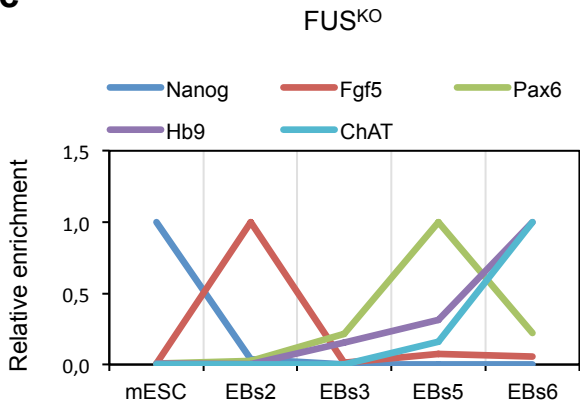

**d**

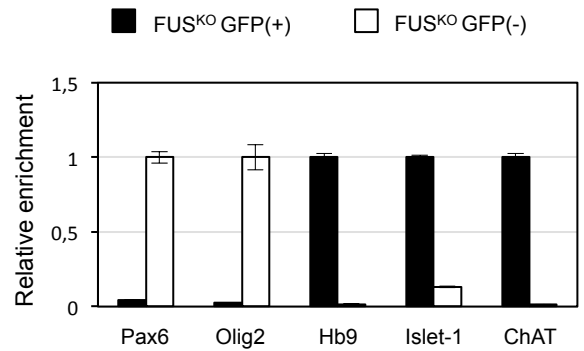

## Supplementary Figure S2

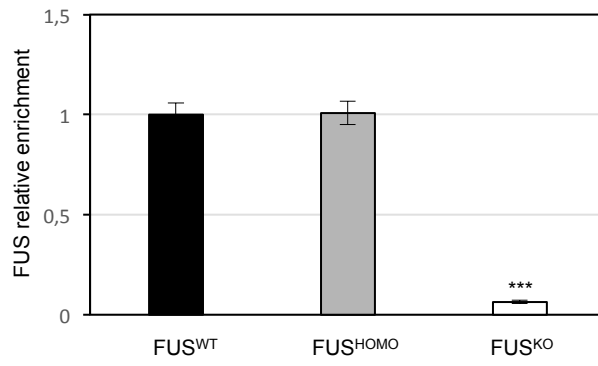

# Supplementary Figure S3

## Biotype of expressed genes

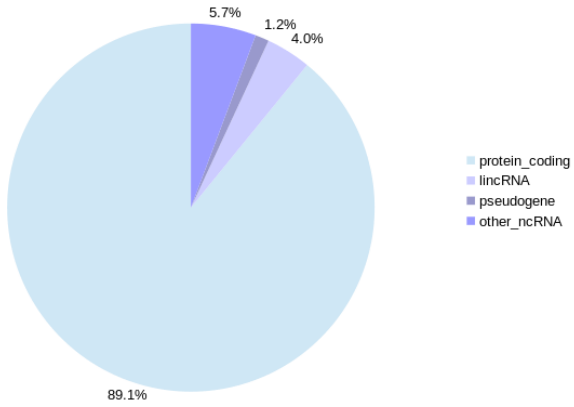

## Biotype of expressed transcripts

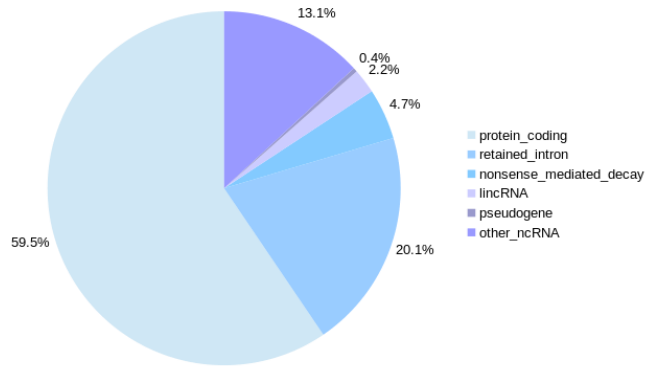

# Supplementary Figure S4

## Biological process

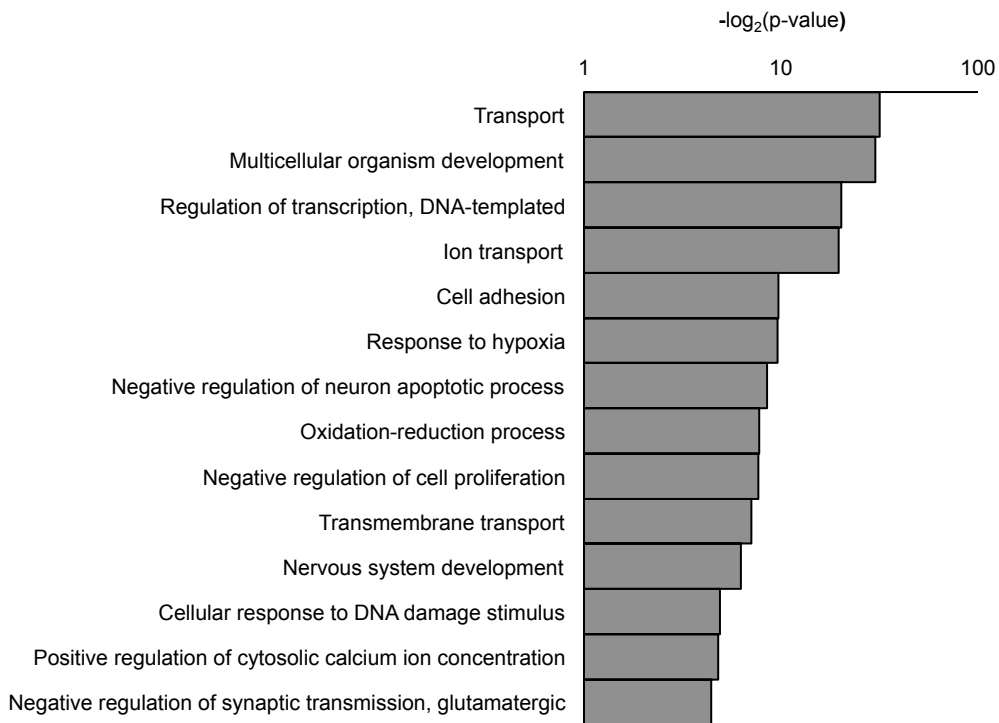

## Kegg pathways

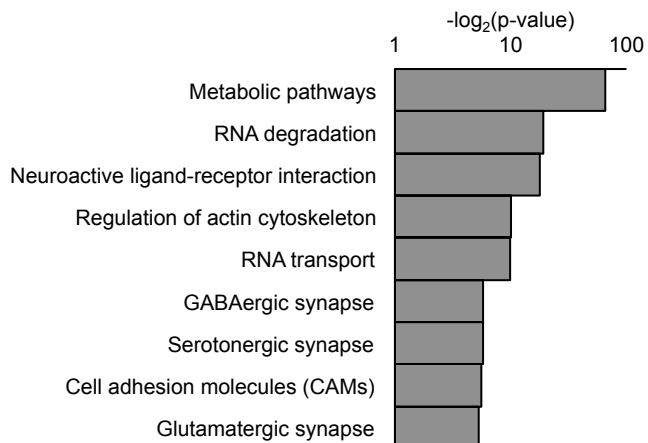

## Supplementary Figure S5

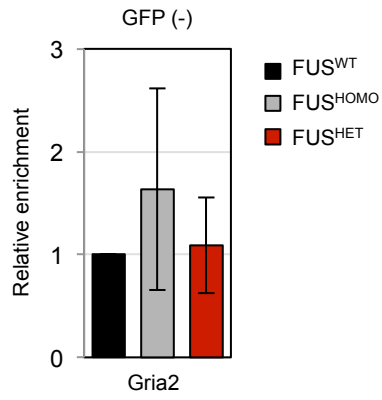

# Supplementary Figure S6

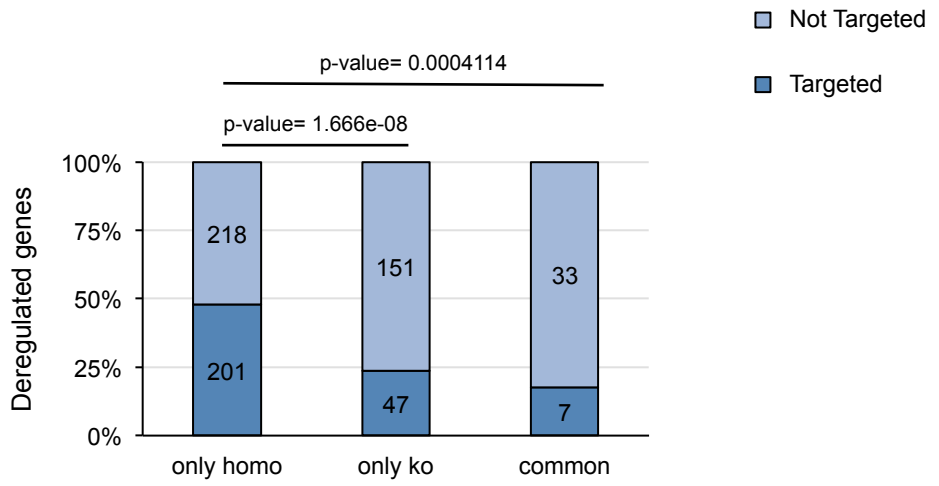

## Supplementary Figure S7

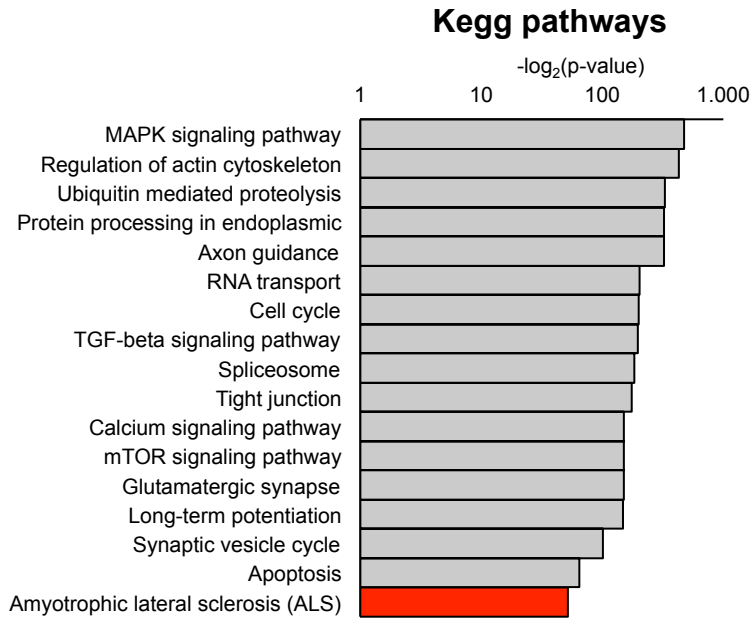

Supplement: 12035_2018_884_MOESM3_ESM.pdf [file 12035_2018_884_MOESM3_ESM.pdf]
